# Supplementary material for: A Pan-Cancer Analysis of the Oncogenic Roles of RAD51 in Human Tumors
Source: Hindawi journal article supplement (doi:10.1155/2022/1591377), 2022-09-17
Supplement: f1 [file 1591377.f1.pdf]

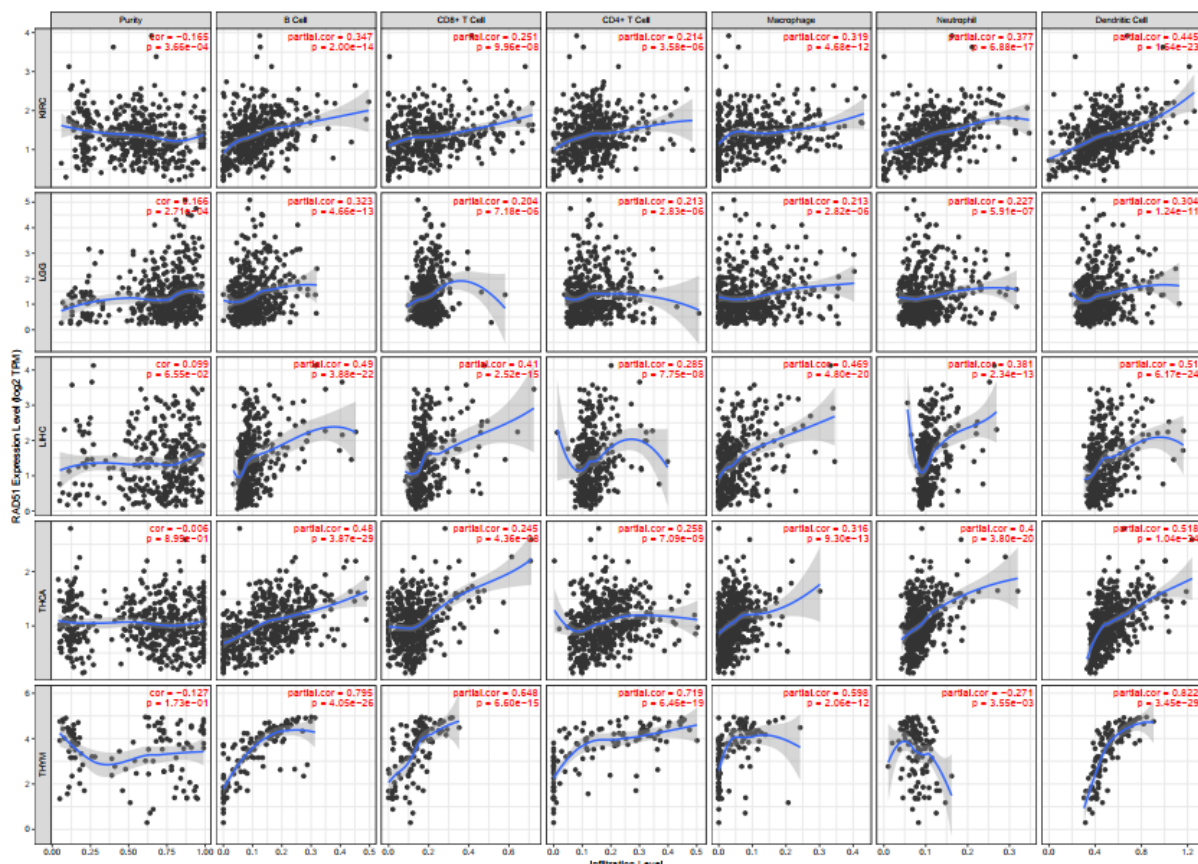

**Figure S1** Relationship between RAD51 expression and the infiltration scores of six immune cell types (B cell, CD4<sup>+</sup> T cell, CD8<sup>+</sup> T cell, neutrophil, macrophage, and dendritic cell) in several tumors (KIRC, LGG, LIHC, THCA and THYM) accessible in TIMER.

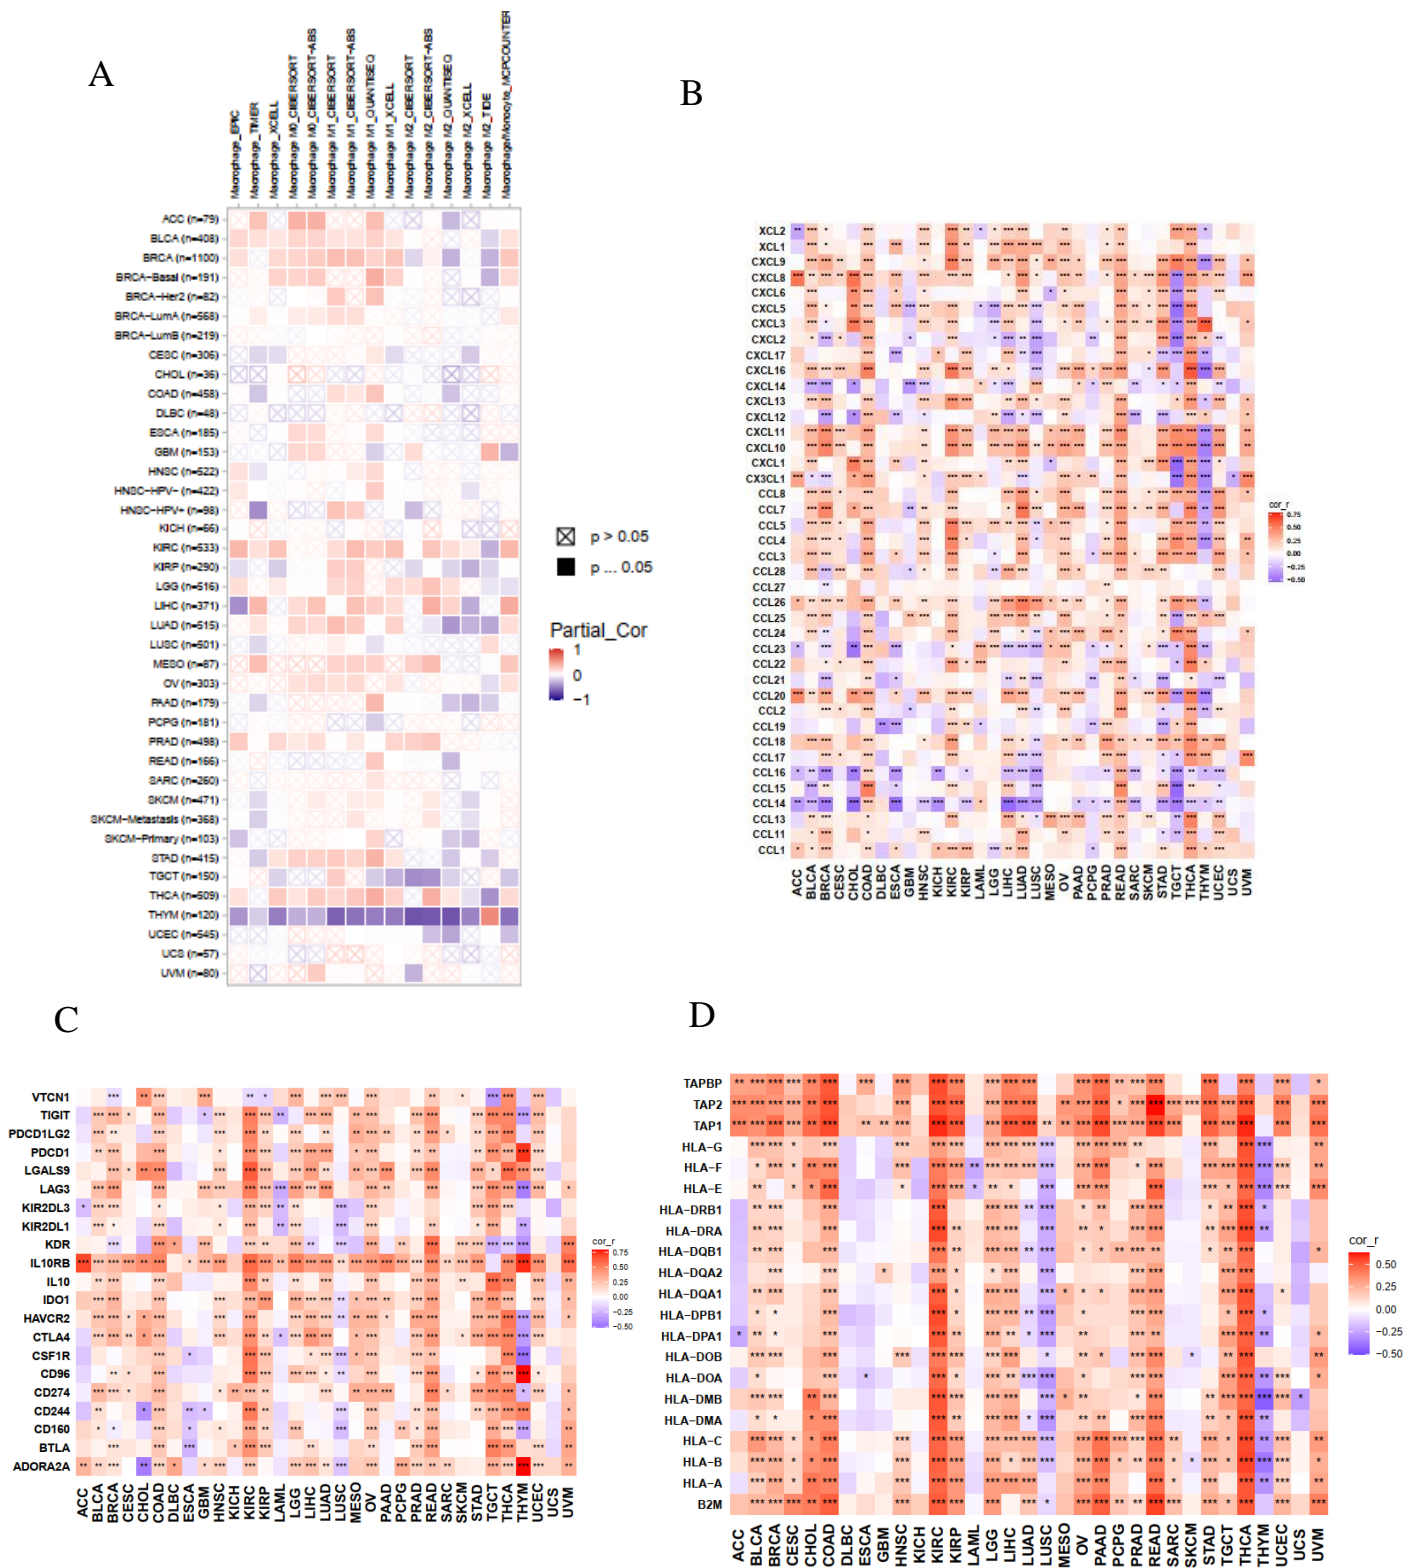

**Figure S2** Correlation of RAD51 expression with (A) macrophages, (B) chemokine, (C) immunosuppressive genes and (D) MHC genes. Red represents positive correlation, blue represents negative correlation, and the darker the color, the stronger the correlation. \*P < 0.05, \*\*P < 0.01, \*\*\*P < 0.001, \*\*\*\*P < 0.0001.

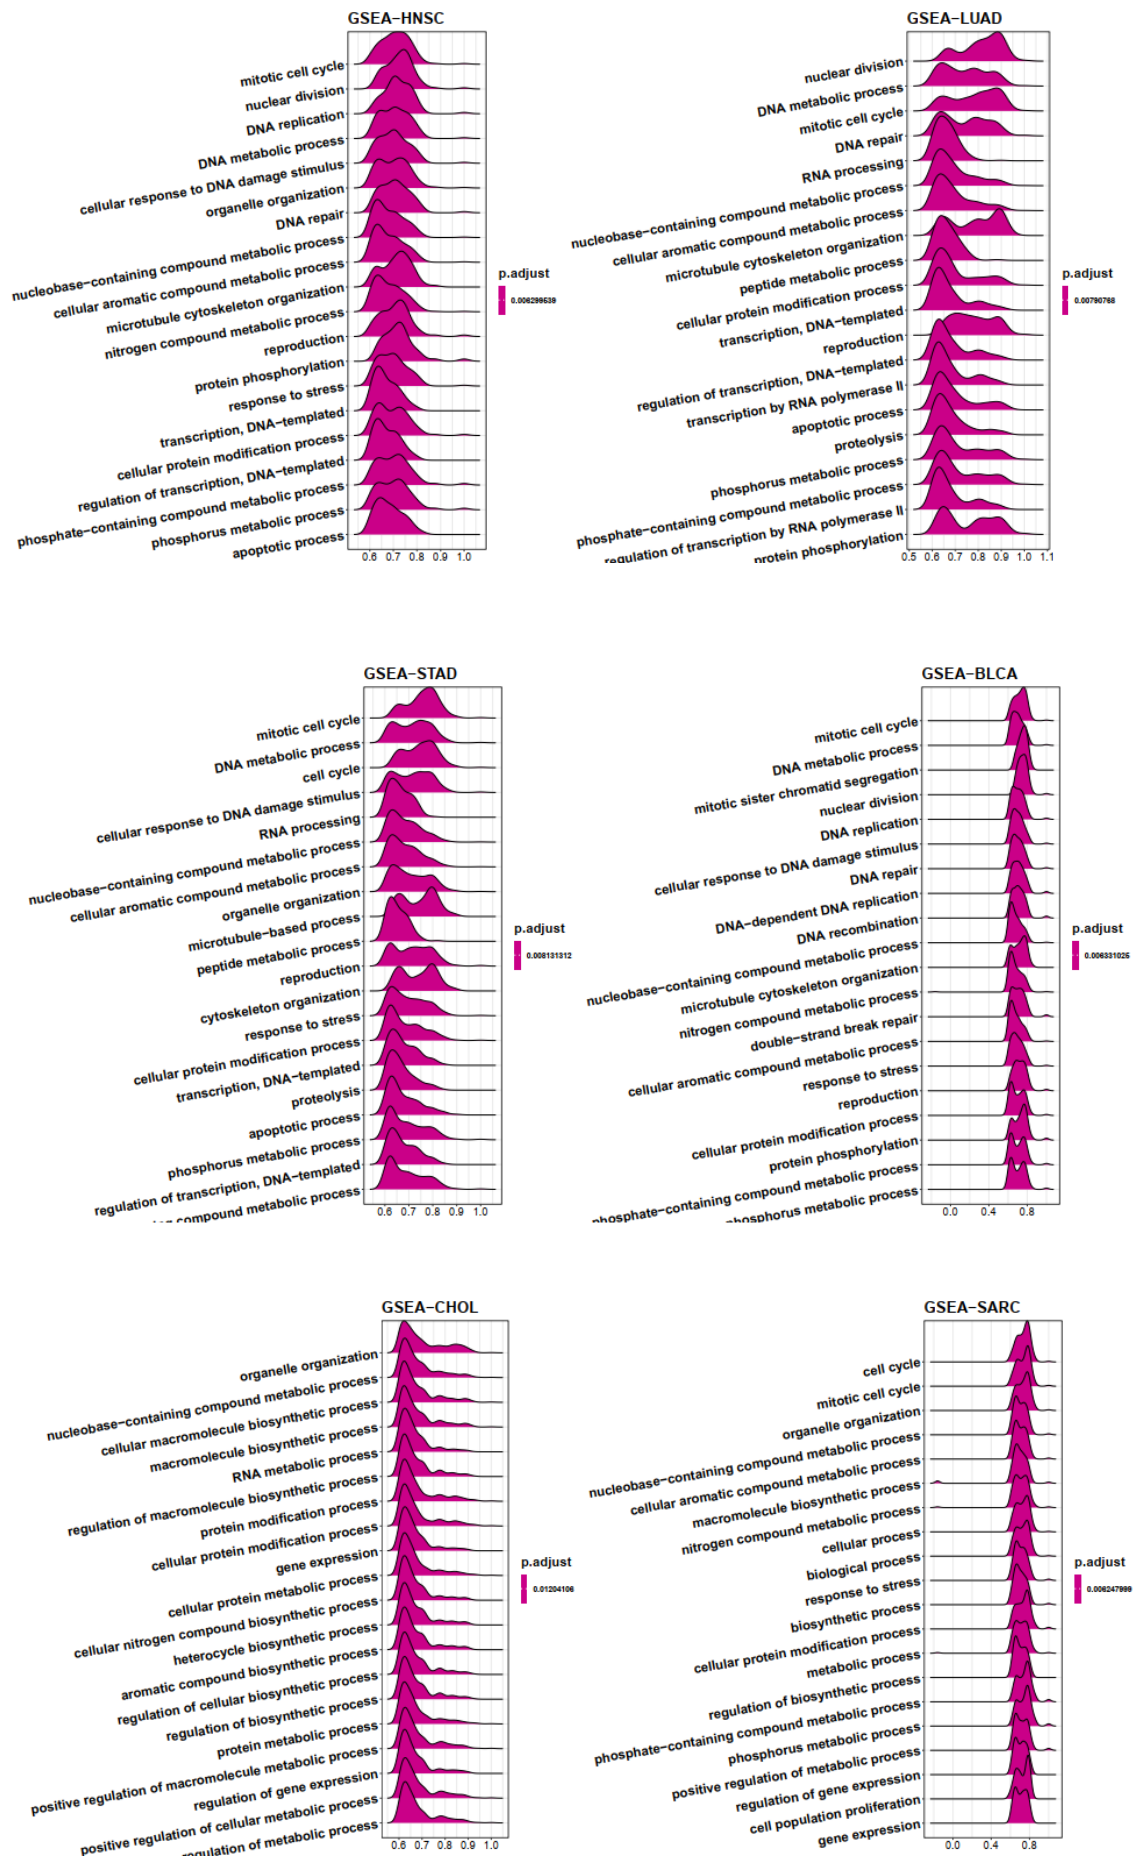

**Figure S3** GSEA of RAD51 in TCGA. The top 20 significant pathways of GSEA results across the indicated tumor types. Adjusted p-value < 0.05 was considered statistically significant.
